# Supplementary material
Source: bioRxiv or medRxiv preprint supplement (https://www.biorxiv.org/highwire/filestream/81809/field_highwire_adjunct_files/7/266668-6.pdf)

**a**

|              | HSC genotype                                | Ref#  | Ref seq                                                 | Indels (bp) | Mutation     |
|--------------|---------------------------------------------|-------|---------------------------------------------------------|-------------|--------------|
| <i>Vdac2</i> | <i>Bak<sup>-/-</sup>Vdac2<sup>-/-</sup></i> | BV2.1 | TGTATCCCTCCACCCTAT-GCTGACCTCGGCAAAGCTGCCAGAGA           |             |              |
|              | <i>Bak<sup>-/-</sup>Vdac2<sup>-/-</sup></i> | BV2.3 | TGTATCCCTCCACCCTAT- <b>GG</b> CTGACCTCGGCAAAGCTGCCAGAGA | +1          | out-of-frame |
|              | <i>Bak<sup>-/-</sup>Vdac2<sup>-/-</sup></i> | BV2.3 | TGTATCCCTCCACCCT-----GACCTCGGCAAAGCTGCCAGAGA            | -5          | out-of-frame |
|              |                                             |       | TGTATCCCTCCACCCTAT <b>CA</b> GCTGACCTCGGCAAAGCTGCCAGAGA | +2          | out-of-frame |
| <i>Bak</i>   |                                             |       | Ref seq                                                 |             |              |
|              | <i>Bak<sup>-/-</sup>Vdac2<sup>-/-</sup></i> | BV2.1 | CTGGACAAGGACCAGGTCCCCCGAAGGTGGGCTGCGATGAGTCCCC          |             |              |
|              | <i>Bak<sup>-/-</sup>Vdac2<sup>-/-</sup></i> | BV2.1 | CTGGACAAGGACCAGGTC-----TGCGATGAGTCCCC                   | -14         | out-of-frame |
|              | <i>Bak<sup>-/-</sup>Vdac2<sup>-/-</sup></i> | BV2.3 | CTGGACAAGGA-----TGAGTCCCC                               | -26         | out-of-frame |

**b**

primary MEFs

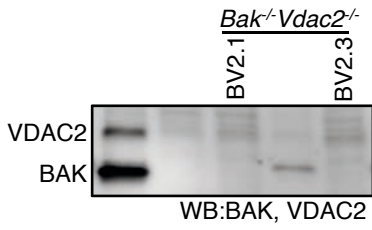

Supplement: Supplementary file [file 266668-6.pdf]
